# Supplementary material for: Interactions Among Related Genes of Renin-Angiotensin System Associated With Type 2 Diabetes
Source: PubMed Central journal article supplement — Diabetes Care. 2010 Jun 30;33(10):2271–3. doi: 10.2337/dc10-0349 (PMC2945173; doi:10.2337/dc10-0349), 2010-06-30
Supplement: supp_dc10-0349_dc100349onlineappendix.pdf [file supp_dc10-0349_dc100349onlineappendix.pdf]

**Supplementary Table A1. Demographic and clinical characteristics of the subjects**

| Characteristic            | All Subjects |            |                  | Males       |            |               | Females    |            |                   |
|---------------------------|--------------|------------|------------------|-------------|------------|---------------|------------|------------|-------------------|
|                           | T2D          | Control    | P-value          | T2D         | Control    | P-value       | T2D        | Control    | P-value           |
| n                         | 394          | 418        |                  | 147         | 171        |               | 247        | 247        |                   |
| Age (years)               | 56.9±10.8    | 55.8±10.8  | 0.176            | 54.1±11.2   | 57.2±10.2  | <b>0.01</b>   | 58.5±10.2  | 54.9±11.1  | <b>&lt;0.01</b>   |
| BMI ( kg/m <sup>2</sup> ) | 26.6±4.0     | 25.2±3.7   | <b>&lt;0.01</b>  | 26.5±3.6    | 24.9±3.7   | <b>0.0001</b> | 26.6±4.2   | 25.5±3.6   | <b>0.01</b>       |
| SBP (mmHg)                | 135.0±19.2   | 134.7±20.1 | 0.833            | 132.8±17.27 | 132.6±18.5 | 0.918         | 136.3±20.2 | 136.2±21.0 | 0.946             |
| DBP (mmHg)                | 81.5±10.7    | 82.3±11.1  | 0.299            | 82.1±10.74  | 82.0±11.7  | 0.895         | 81.1±10.6  | 82.6±10.7  | 0.138             |
| TC (mmol/l)               | 4.90±1.04    | 4.41±0.82  | <b>&lt;0.01</b>  | 4.78±0.99   | 4.42±0.88  | <b>0.001</b>  | 4.96±1.06  | 4.40±0.78  | <b>&lt;0.0001</b> |
| TG (mmol/l)               | 2.10±0.67    | 1.33±0.83  | <b>&lt;0.001</b> | 2.22±0.63   | 1.30±0.87  | <b>0.001</b>  | 2.03±0.69  | 1.36±0.80  | <b>&lt;0.0001</b> |
| HDL-c (mmol/l)            | 1.15±0.34    | 1.19±0.26  | 0.069            | 1.09±0.32   | 1.17±0.30  | <b>0.009</b>  | 1.19±0.34  | 1.20±0.22  | 0.752             |
| LDL-c (mmol/l)            | 3.06±0.94    | 2.83±0.76  | <b>&lt;0.001</b> | 3.07±0.82   | 2.89±0.83  | 0.053         | 3.05±1.00  | 2.79±0.71  | <b>0.001</b>      |
| Cr (umol/l)               | 58.0±8.4     | 57.1±7.8   | 0.426            | 65.5±10.4   | 64.9±11.1  | 0.661         | 54.0±7.9   | 52.0±7.6   | 0.145             |

Data are presented as mean ± SD. T2D, type 2 diabetes; BMI, body mass index; SBP, systolic blood pressure; DBP; diastolic blood pressure; TC, total cholesterol; TG, triglyceride; HDL-c, high-density lipoprotein cholesterol; LDL-c, low-density lipoprotein cholesterol.

**Supplementary Table A2. Allele frequency of each polymorphism for RAS related genes**

| Genotype               | Males       |             |         | Females     |             |              |
|------------------------|-------------|-------------|---------|-------------|-------------|--------------|
|                        | T2D         | Control     | P-value | T2D         | Control     | P-value      |
| AGT (rs699) C/T        | 0.80 : 0.20 | 0.79 : 0.21 | 0.95    | 0.78 : 0.22 | 0.80 : 0.20 | 0.75         |
| ACE (I/D)              | 0.60 : 0.40 | 0.57 : 0.43 | 0.41    | 0.61 : 0.39 | 0.58 : 0.42 | <b>0.039</b> |
| ACE2 (rs2074192) C/T   | 0.58 : 0.42 | 0.56 : 0.44 | 0.76    | 0.56 : 0.44 | 0.54 : 0.46 | 0.11         |
| ACE2 (rs2106809) G/A   | 0.54 : 0.46 | 0.51 : 0.49 | 0.53    | 0.51 : 0.49 | 0.48 : 0.52 | 0.21         |
| AGTR1 ( rs5186) A/C    | 0.92 : 0.08 | 0.94 : 0.06 | 0.27    | 0.94 : 0.06 | 0.95 : 0.05 | 0.55         |
| AGTR2 (rs1403543) A/G  | 0.59 : 0.41 | 0.53 : 0.47 | 0.34    | 0.61 : 0.39 | 0.62 : 0.38 | 0.59         |
| Mas (rs220721) A/G     | 0.66 : 0.34 | 0.64 : 0.36 | 0.19    | 0.66 : 0.34 | 0.63 : 0.37 | 0.24         |
| BDKRB2 (rs1799722) C/T | 0.63 : 0.37 | 0.57 : 0.43 | 0.30    | 0.64 : 0.36 | 0.61 : 0.39 | 0.54         |

Data are presented as Common : Rare allele. The P-value was obtained by the  $X^2$  test. T2D, type 2 diabetes; AGT, angiotensinogen; ACE, angiotensin-converting enzyme; ACE2, angiotensin-converting enzyme 2; AGTR1, angiotensin II type I receptor; AGTR2, angiotensin II type II receptor; BDKRB2, bradykinin receptor 2.
